# Supplementary material for: Evaluation of the Oscillation Velocity in the Neck of the Helmholtz Resonator in Nonlinear Regimes
Source: MDPI journal article supplement (doi:10.3390/acoustics4030035), 2022-07-19
Supplement: s1 [file s1]

---

## Supplementary

# Evaluation of the Oscillation Velocity in the Neck of the Helmholtz Resonator in Nonlinear Regimes

Aleksandr Komkin <sup>1,\*</sup>, Aleksei Bykov <sup>1</sup> and Olga Saulkina <sup>1</sup>

Department of Environment and Safety, Bauman Moscow State Technical University, Moscow, Russia, 105005;  
a.i.bykov@bmstu.ru (A.B.); saulkinaolya@yandex.ru (O.S.)

\* Correspondence: akomkin@mail.ru

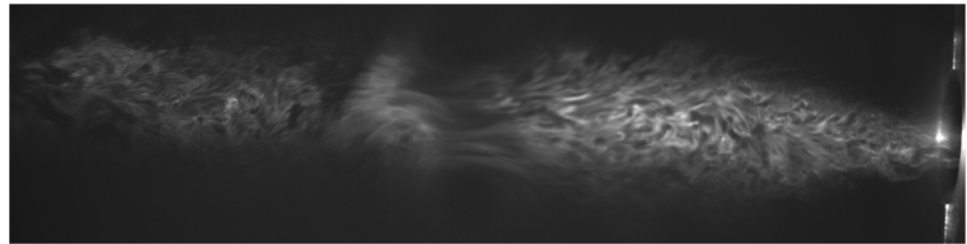

**Figure S1.** Longitudinal section of the acoustic flow, distance from the partition shown in calibers of the ori-fice.

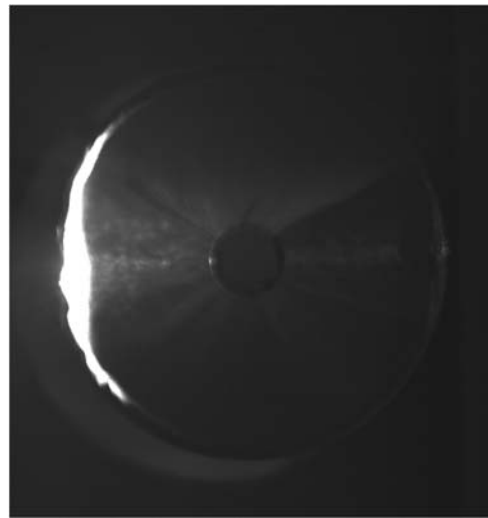

**Figure S2.** A section parallel to the partition with an orifice
